# Supplementary material
Source: publisher figshare collection journal article supplement (https://acs.figshare.com/ndownloader/files/4170868)
Supplement: Supplementary file 1 [file 4170868]

## Rattle-type Carbon-Alumina Core-Shell Spheres: Synthesis and Application for Adsorption of Organic Dyes

Jiabin Zhou,<sup>a</sup> Chuan Tang,<sup>a</sup> Bei Cheng,<sup>a</sup> Jiaguo Yu<sup>\*a</sup>, and Mietek Jaroniec<sup>\*b</sup>

<sup>a</sup> State Key Laboratory of Advanced Technology for Materials Synthesis and Processing  
and School of Resources and Environmental Engineering,  
Wuhan University of Technology, Wuhan 430070, P. R. China

<sup>b</sup> Department of Chemistry and Biochemistry,  
Kent State University, Kent, Ohio, 44242, USA

**Table S1.** Intra-particle diffusion model constants and correlation coefficients for adsorption of Orange-II dye on the samples studied

| Sample | C <sub>0</sub><br>(mg/L) | Intra-particle diffusion model               |       |                |
|--------|--------------------------|----------------------------------------------|-------|----------------|
|        |                          | k <sub>d</sub><br>(mg/g min <sup>1/2</sup> ) | C     | R <sup>2</sup> |
| CAI-2  | 25                       | 4.30                                         | 20.59 | 0.973          |
| CAI-5  |                          | 6.79                                         | 25.13 | 0.921          |
| CAI-10 |                          | 6.17                                         | 42.34 | 0.964          |

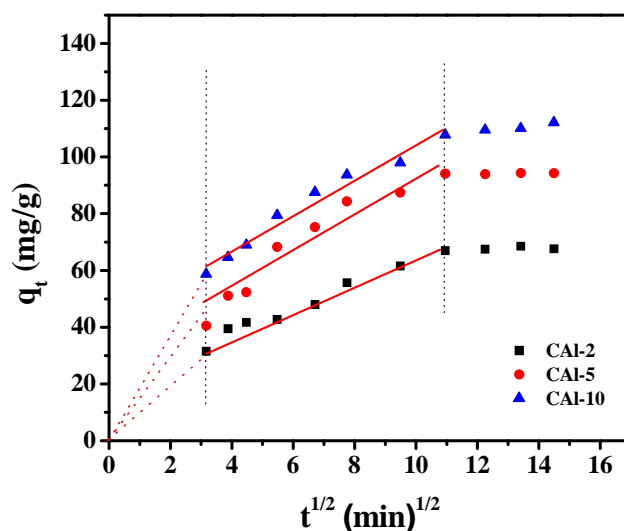

**Fig. S1** Intra-particle diffusion kinetics for adsorption of O-II dye onto the CAI-2, CAI-5 and CAI-10 samples (T = 25 °C; adsorbent dose = 200 mg/L; O-II concentration = 25 mg/L and pH 5.0~6.0).
